# Supplementary material for: Patients and healthcare professionals’ voice on preventable readmissions
Source: HighWire-hosted journal article supplement (doi:10.1136/bmjoq-2021-001344), 2021-06-01
Supplement: bmjoq-2021-001344supp001_data_supplement.pdf [file bmjoq-2021-001344supp001_data_supplement.pdf]

Patient interview about functional status at discharge, discharge process, follow-up care and readmission preventability (survey adapted from Howard-Anderson J, et al. Readmissions in the era of patient engagement. JAMA Intern Med. 2014;174[11]:1870-1872).

|    |                                                                                                                                                                                   |
|----|-----------------------------------------------------------------------------------------------------------------------------------------------------------------------------------|
| 1  | In general, would you say your health is: excellent, very good, good, fair, or poor?                                                                                              |
| 2  | Do you remember the discharge diagnosis?                                                                                                                                          |
| 3  | Were you able to walk by yourself after discharge?                                                                                                                                |
| 4  | Were you able to get out of bed or chair by yourself during the past weeks?                                                                                                       |
| 5  | Were you able to take a shower or bath by yourself during the past weeks?                                                                                                         |
| 6  | Were you able to prepare your own food during the past weeks?                                                                                                                     |
| 7  | Were you able to go grocery shopping by yourself during the past weeks?                                                                                                           |
| 8  | Attended $\geq 1$ follow-up appointment?                                                                                                                                          |
| 9  | Follow-up appointment with PCP arranged or already scheduled on discharge?                                                                                                        |
| 10 | Had medications reviewed before discharge?                                                                                                                                        |
| 11 | Felt all concerns were addressed before discharge?                                                                                                                                |
| 12 | Do you remember if during the hospitalization you were informed about the follow-up recommendations at discharge?                                                                 |
| 13 | Who informed you about the recommendations to follow at discharge? (nurse, physician, both)                                                                                       |
| 14 | Are you satisfied with the information received at discharge by the healthcare team? (0-10)                                                                                       |
| 15 | Destination of hospital discharge (home, nursing home, intermediate long-term care facility, other)                                                                               |
| 16 | When have you been notice of the day of discharge?                                                                                                                                |
| 17 | Did you feel ready for discharge?                                                                                                                                                 |
| 18 | Reported improved overall health condition from index admission to index discharge?                                                                                               |
| 19 | Contacted health care professional before readmission?                                                                                                                            |
| 20 | Do you think your readmission could have been prevented?                                                                                                                          |
| 21 | Do you think this readmission is related to the previous one?                                                                                                                     |
| 22 | During discharge did you have any symptoms? (pain, sleeping difficulty, dyspnoea, weakness, asthenia, diarrhoea, nausea or vomiting, shivers, fever, anxiety, worried, confusion) |
| 23 | Over the last 2 weeks, how often have you felt bothered by any of the following: a) Little interest or pleasure in doing things; b) Feeling down, depressed, or hopeless          |
